# A new approach to crop model calibration: phenotyping plus post-processing.

Pierre Casadebaig (1), Philippe Debaeke (1), Daniel Wallach (1)

(1) AGIR, Université de Toulouse, INRA, Castanet-Tolosan, France

## Keywords

crop modeling, calibration, phenotyping

## Abstract

Crop models contain a number of genotype-dependent parameters, which need to be estimated for each genotype. This is a major difficulty in crop modeling. We propose a hybrid method for adapting a crop model to new genotypes. The genotype-dependent parameters of the model could be obtained by phenotyping (or gene-based modeling). Then field data for example from variety trials could be used to provide a simple empirical correction to the model, of the form  $a + b$  times an environmental variable. This approach combines the advantages of phenotyping, namely that the genotype-specific parameters have a clear meaning and are comparable between genotypes, and the advantages of fitting the model to field data, namely that the corrected model is adapted to a specific target population. It has the advantage of being very simple to apply, and furthermore gives useful information as to which environmental variables are not fully accounted for in the initial model.

In this study, this empirical correction is applied to the SUNFLO crop model for sunflower, using field data from a multi-environment trial network. The empirical correction reduced mean squared error (MSE) on the average by 54% for prediction of yield and by 26% for prediction of oil content, compared to the initial model. Most of the improvement came from eliminating bias, with some further improvement from the environmental term in the regression.

## Introduction

Crop model predictions depend on the model equations, the values of the input variables and the values of the parameters. Of course all three components are critical, but arguably it is the parameter values that present the greatest difficulty for model users. We focus here on parameter estimation for crop models.

Crop models often have a large number of parameters, perhaps more than 100. The STICS model for instance includes 132 parameters (Ruget et al., 2002). It is common to divide them into categories of generality. Some parameters are assumed to apply very generally and so are not meant to be altered for different applications. For example, in the SUNFLO model (Casadebaig et al., 2011; Lecoeur et al., 2011), there are parameters representing the effect of temperature and soil moisture on N mineralization rate, which are treated as fixed for all uses. Another set of parameters is specific to a particular species, which applies to generic models like DSSAT (Jones et al., 2003), APSIM (Holzworth et al., 2014) or STICS (Brisson et al., 2003) which can simulate for multiple species. For example, DSSAT has species senescence parameters related to vegetative stage, freeze damage, nitrogen remobilization, drought and canopy self-shading which are included in a species file. Finally, crop models have genotype-dependent parameters. For example, DSSAT uses six genotype-dependent parameters for maize, including photoperiod sensitivity and potential grain number. The SUNFLO model has 10 genotype-dependent parameters (two for degree days to key development stages, four for shoot architecture, two for response to water deficit and two for biomass allocation). For most model users, the general and species-specific parameters can be subsumed into *model structure*, since they are not altered from the values provided by the model developers. However, the problem is rather different for genotype-dependent parameters. There are very many varieties, which are often region-specific and furthermore new varieties are regularly developed and released. Obtaining genotype-dependent parameters is a never-ending problem.

There are three quite different approaches to estimation of genotype-dependent parameters that have been proposed. The most common procedure is to calibrate the model using field data for the variety in question, by searching the parameter space for the genotype-dependent parameters that give a good fit to the field data. An example is the study in Li et al. (2015) in which DSSAT maize and wheat are calibrated for new varieties (i.e. varieties not previously studied with DSSAT) in China. One disadvantage of this approach is that parameters are only available after the variety is disseminated, which may lead to a delay of several years between the development of the variety and the corresponding calibration of a crop model. In addition, in the absence of a standardized protocol, it may be difficult to compare varieties using a crop model, because differences in parameter values may also be due to differences in the type of data used for calibration. At the opposite extreme is gene-based modeling, where parameters are estimated based on the allelic composition of the genotype. In this case, models can be parameterized for new genotypes even before the genotype has been cultivated in the field. Developing such models is a major topic in modeling (Cooper et al., 2016; Hammer et al., 2016; Wallach et al., 2018), but as yet this approach is not widespread. An intermediate approach in terms of timing is model calibration based on phenotyping. In this approach, the genotype-dependent parameters of a crop model are measured using a standardized protocol of field or controlled environment experimentation coupled with detailed phenotype measures (Casadebaig, Zheng, et al., 2016; Debaeke et al., 2010). This approach allows the measurement of genotype-dependent parameters at an early stage of variety testing. The fact that a standard protocol is used reduces the uncertainty in comparisons between varieties. High-throughput phenotyping could make this approach more efficient and allows one to include additional genotype-dependent parameters (Furbank and Tester, 2011 ; Gosseau et al., 2019; Tardieu et al., 2017 ).

There is a fundamental difference between the first approach, based on field measurements, and the phenotyping approach. The latter implicitly assumes that the genotype-dependent parameters, or more generally all the model parameters, can be applied in all environments. There is no mechanism in this approach to adapt the model to a specific set of environmental conditions, i.e. to a specific target population. On the other hand, when field measurements are used, the calibration adjusts the model not only for the new variety, but also *de facto* adjusts the parameters to the target population represented by those data. The difference would not be important, if indeed the same parameters were applicable to all environments, without need of adjustment depending on target population. However, it seems clear that in fact calibration is needed to adapt to different target populations. A general argument is made by Jørgensen and Fath (2011) regarding models in ecology. Wallach et al. (2011) shows explicitly, for crop models, that calibrated parameters compensate for errors in fixed parameters, and that the compensation depends on the target population. A first conclusion is that the genotype-dependent parameters found by

calibration to field data are not the “true” parameters, i.e. the values that one would obtain by studying each individual process of the crop model individually, and in the limit of a very large amount of data. A second conclusion is that calibration is needed for each new target population. Overall then, crop model calibration based on field data has the advantage that it adapts the model to a specific target population, but the disadvantage that the resulting genotype-dependent parameters are difficult to interpret and to compare between studies. Phenotyping estimation of genotype-dependent parameters has the advantage that the parameters have physiological meaning, but the disadvantage that the model is not adapted for a specific target population. In gene-based models, because allelic composition is indeed constant between environments, the adaptation to a specific target population is moved to model structure.

The purpose of this study is to propose an hybrid approach, which combines phenotyping estimation of genotype-dependent parameters with calibration using field data. In this approach, the calibration is done not by modifying the model parameters, but by adding a simple empirical adjustment to the model of the form  $a + b$  times an environmental variable. The goal is to combine the advantages of each approach; the phenotyping procedure produces genotype-dependent parameters of a crop model that have physiological meaning and the empirical adjustment produces a model that is adapted to a specific target population. We note that the field data needed for the systematic application of an empirical adjustment is often available, in the form of variety trials by breeders and/or post-registration multi environment trials (METs) by extension services.

We apply our proposed approach to the SUNFLO crop model. The model was specifically developed to use parameters that can be estimated by a standard phenotyping protocol, and has been parameterized in this way for a large number of sunflower varieties (Casadebaig, Zheng, et al., 2016; Debaeke et al., 2010). The empirical correction is based on the large multi-environment trials conducted each year by breeders, examination offices and agricultural extension services in France to compare genotypes and assess their value for cultivation and use.

## Material and methods

### Field data

To train the linear model used in the calibration process, we relied on the variety testing network targeting released genotypes in France (Mestries and Jouffret, 2002) and conducted by the French technical institute in charge of references for oilseed crops and grain legumes (namely *Terres Inovia*). While this testing is conducted yearly, data is not in a readily usable format, and a major effort is needed to gather climate and soil data relevant to the tested locations. Here, we reused a dataset fully described in Casadebaig, Emmanuelle Mestries, et al. (2016), and summarized its main characteristics below. The target population represented by this dataset is sunflower cropping area in France with current recommended management.

Trials were conducted in 52 locations during one year (2009). Locations concentrating the most trials represented about 75 % of the cultivated sunflower area in France, i.e. Poitou-Charentes (16 trials), Centre (9), Midi-Pyrénées (8) and Pays de Loire (7) regions. The network was split in three geographical zones, matching the operational areas of the technical institute and referred to as South (South and South-West France), West (Center and West France), and East (North and East France). At each location, one to four variety trials were conducted (differing by maturity group or fatty acid composition - oleic vs linoleic), for a total of 82 trials performed over the network. Only the locations that could be reasonably described (nearby weather station, sufficient information on soil depth, reliable information on crop management) were kept in the dataset (82 out of 99 trials in the MET). Furthermore, only genotypes with data from at least 10 trials were retained (28 genotypes). In each trial, grain yield ( $t.ha^{-1}$ , 0% humidity) and oil concentration (% , 0% humidity) were measured. Overall, the data represent 628 average plots (averaged over 3-4 replicates per genotypes  $\times$  location modality)

### SUNFLO crop model description

SUNFLO is a process-based simulation model for sunflower that was developed to simulate grain yield and oil concentration as a function of time, environment (soil and climate), management practices and genetic diversity (Casadebaig et al., 2011; Lecoeur et al., 2011). Predictions with the model are restricted to

attainable yield (Van Ittersum and Rabbinge, 1997): only the main limiting abiotic factors (temperature, light, water and nitrogen) are included in the algorithm.

The model simulates the main soil and plant functions: root growth, soil water and nitrogen dynamics, plant transpiration and nitrogen uptake, leaf expansion and senescence, and biomass accumulation. Globally, the SUNFLO crop model has about 50 equations and 64 parameters split in 33 species parameters, 10 genotype-dependent, and 21 environment-related. A report that summarizes the equations and parameters used in the model is available as supplementary information in Picheny et al. (2017).

The values of the genotype-dependent parameters were obtained by measuring the value of the corresponding 10 phenotypic traits in dedicated field platforms and controlled conditions. Our aim was to measure potential trait values, so different environmental conditions were targeted depending on the set of traits: field non-limiting conditions (deep soil) for phenological and architectural traits, field pre-anthesis limiting conditions (shallow soil) for allocation traits, and a range of controlled water deficits (greenhouse) for response traits.

For field experiments, sunflower hybrids were phenotyped in ten trials (two locations, five years: 2008-2012), using randomized complete block designs with three repetitions of 30 m<sup>2</sup> plots (6-7 plant m<sup>-2</sup>), see Debaeke et al. (2010) and Casadebaig, Emmanuelle Mestries, et al. (2016) for additional details. For controlled conditions, hybrids were phenotyped in 10 liters pots, during six greenhouse experiments to determine the response of leaf expansion and transpiration at the plant scale after stopping watering and letting the soil progressively dry (dry-down design). We used randomized complete block designs with two water treatments (control, stress) and six repetitions (7 pots m<sup>-2</sup>), see Casadebaig et al. (2008) for additional details.

| Function     | Name | Description                                                   | Unit                    | Min     | Max     |
|--------------|------|---------------------------------------------------------------|-------------------------|---------|---------|
| Phenology    | TDF1 | Temperature sum from emergence to the beginning of flowering  | <i>Cd</i>               | 744.25  | 906.60  |
| Phenology    | TDM3 | Temperature sum from emergence to seed physiological maturity | <i>Cd</i>               | 1460.80 | 2054.90 |
| Architecture | TLN  | Potential number of leaves at flowering                       | <i>leaf</i>             | 22.20   | 36.67   |
| Architecture | LLH  | Potential rank of the plant largest leaf at flowering         | <i>leaf</i>             | 12.30   | 23.20   |
| Architecture | LLS  | Potential area of the plant largest leaf at flowering         | <i>cm</i> <sup>-2</sup> | 139.49  | 670.00  |
| Architecture | K    | Light extinction coefficient during vegetative growth         | -                       | 0.78    | 1.00    |
| Response     | LE   | Threshold for leaf expansion response to water stress         | -                       | -15.57  | -2.15   |
| Response     | TR   | Threshold for stomatal conductance response to water stress   | -                       | -14.21  | -5.51   |
| Allocation   | HI   | Potential harvest index                                       | -                       | 0.25    | 0.51    |
| Allocation   | OC   | Potential seed oil content                                    | %                       | 47.77   | 62.30   |

**Table 1: Description and variation range for genotype-dependent parameters of the SUNFLO model.** The maximum and minimum values reported represent the genotypic variability observed among phenotyped sunflower cultivars.

## Calibration process

Calibration was applied to the two output variables of the simulation model of major importance, namely crop grain yield and grain oil concentration.

First, the original model was run, and the model residuals were calculated. The model residuals are defined as  $y_i - f(X_i; \theta)$  where  $y_i$  is the measured value for environment  $i$ ,  $f(X_i; \theta)$  is the corresponding simulated result which depends on the input variables  $X_i$  and on the parameters  $\theta$  obtained by phenotyping. The second step is to fit an empirical correction to the residuals, separately for each genotype. In a first correction method (the *delta* method), the average of the residuals was calculated, noted  $\hat{a}$ . The corrected model is  $f(X_i; \theta) + \hat{a}$ . In the second method (the *linear* method), the models  $a + bZ_i$  were fit to the residuals, where  $Z_i$  is one of four candidate input variables. The input variable which gave the smallest mean squared error (MSE),  $Z_s$  was selected by comparing regression models. The model with linear correction is then  $f(X_i; \theta) + \hat{a} + \hat{b}Z_{s_i}$  where  $\hat{a}$  and  $\hat{b}$  are the estimated regression coefficients.

The four candidate input variables considered for the empirical correction are shown in table 2. They represent variables related to water (total precipitation or average water stress), radiation and temperature.

In each case, a sum over the growing season, from sowing to maturity as simulated by SUNFLO, was used. Obviously, a very large number of other possible variables could be listed. The choice here was to restrict the number of candidates to a very small number, representing the major abiotic factors known to affect sunflower growth and development.

| label         | factor      | description                                       |
|---------------|-------------|---------------------------------------------------|
| Precipitation | water       | Sum of precipitations                             |
| Radiation     | light       | Sum of photosynthetically active radiation        |
| Temperature   | temperature | Sum of days with mean temperature less than 20 °C |
| Water deficit | water       | Sum of days with simulated water deficit          |

**Table 2. Candidate variables for fitting SUNFLO residuals.** Sums are over the growing season, from sowing to maturity as simulated by SUNFLO.

## Evaluation of the calibration process

We used classical goodness-of-fit metrics. The first is mean squared error (MSE), or root mean squared error (RMSE) and the decomposition of MSE into a sum of three components (Kobayashi and Salam, 2000): SB which is squared bias, SDSD which measures the difference in spread (specifically in standard deviation) between the observed and simulated values and LCS which depends on the correlation of measured and simulated values and so measures how well the simulated values track the variability in the observations.

Five-fold cross validation was used to evaluate the predictive accuracy of the corrected model. For each genotype, the data points were separated into five approximately equal parts (folds). Each fold in turn was designated the evaluation data, the remaining folds serving as training data. The linear correction, including the choice of the input variable for the empirical correction, was calculated using the training data and model prediction error was evaluated on the evaluation data. The procedure was repeated five times, so that each fold served once as evaluation data. In this way, each data point appeared exactly once in the evaluation data. The reported measures of predictive accuracy are averages over the five evaluation data sets.

## Software and data processing

Experimental and simulated data were processed with the R software version 3.5.1 (R Core Team, 2018) with R packages *dplyr* (data processing) (Wickham et al., 2018), *ggplot2* (visualization) (Wickham, 2016), and *knitr* (reporting) (Xie, 2015). The source code for the SUNFLO simulation model is available on INRA software repository [<https://forgemia.inra.fr/record/sunflo.git>]. The INRA VLE-RECORD software environment (Bergez et al., 2013; Quesnel et al., 2009) was used as simulation platform.

## Results

### Environment-related input variables and relation to residuals

Figure 1 displays the variability in environment variables, over the 52 locations of the MET in 2009. Distributions of these variables tend to be bimodal, which can be explained by the spatial structuration of the network, designed for testing late maturing cultivars in drought-prone locations (e.g. South-West of France), while early maturing cultivars were tested in colder and more humid environments. Because of this spatial variability most variables displayed a strong coefficient of variation ( $\sim 35\%$  for temperature and precipitation,  $\sim 60\%$  for water deficit). Radiation showed lesser variability ( $\sim 7\%$ ).

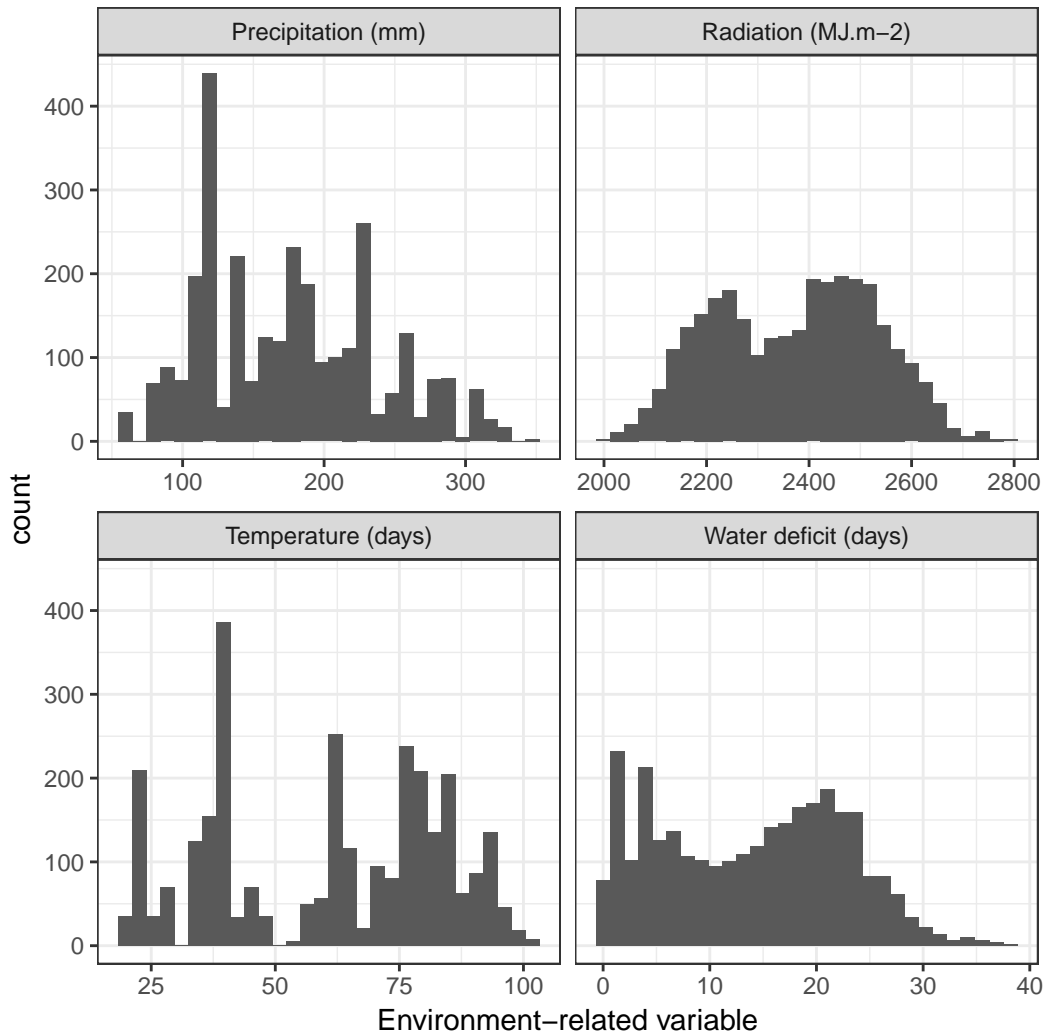

**Figure 1. Distribution of selected environment-related variables in the network of trials.** Each panel displays the histogram of selected environment-related variables : temperature (days with air temperature less than 20°C), water deficit (days with photosynthesis-limiting water deficit), radiation (sum of photosynthetically active radiation), and water (sum of precipitation). All sums are done over the growing season, from sowing to maturity as simulated by SUNFLO.

The regressions between the candidate variables and model residuals are presented in figure 2. Each panel only shows those genotypes for which the indicated candidate variable was chosen. Supplementary figure S1 illustrates these regressions in more detail for a subset of the dataset. Precipitation was the most-often chosen input to predict yield residuals (70 % of the population of genotypes) and temperature was most-often chosen for oil concentration residuals (55 % of the genotypes). For yield residuals related to precipitation, mean Pearson's coefficient of correlation was 0.44 (ranging from -0.22 to -0.63). For oil concentration related to temperature, mean Pearson's coefficient of correlation was -0.33 (ranging from -0.12 to -0.58). In two cases, a candidate input variable was not chosen for any genotype. Water deficit was not useful to explain grain yield residuals nor was radiation for oil concentration residuals.



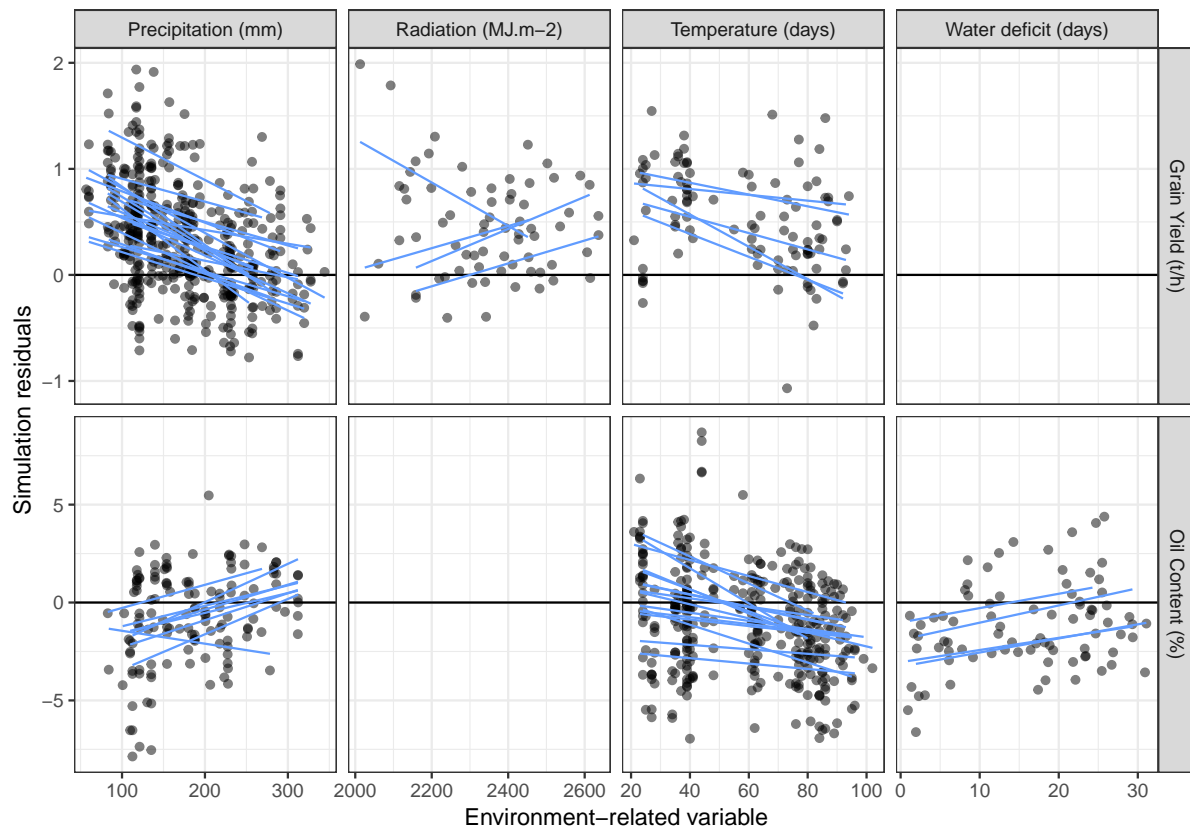

**Figure 2. Linear relations between simulation model residuals and chosen environment-related variables.** The panels display linear models fit to SUNFLO residuals (blue lines). Each line corresponds to one genotype. In each panel, data are only shown for those genotypes for which the indicated input variable gave the best fit. Output variables (Grain yield, oil concentration) are displayed in rows and environment-related variables are displayed in columns.

## Effect of empirical correction

The SUNFLO model with parameter values based on phenotyping, before any correction, has an average RMSE of 0.63 t/ha for yield and 2.7% for oil content (figure 3). While these values were sufficient for some model applications, it is clearly of interest to try to improve model predictions.

We analyzed how the two empirical correction methods that we tested impacted the predicted values for grain yield and oil concentration (figure 3). Prediction quality was improved by the empirical correction process for all variables and methods, with the best improvement for the *linear* method. For grain yield correction, bias was essentially removed by the calibration methods and the linear regression further improved the predictions, particularly for the drought-prone cropping conditions (i.e. South zone in figure 3). This improvement was less important for oil concentration correction, with little additional improvement from the linear correction compared to the delta method.

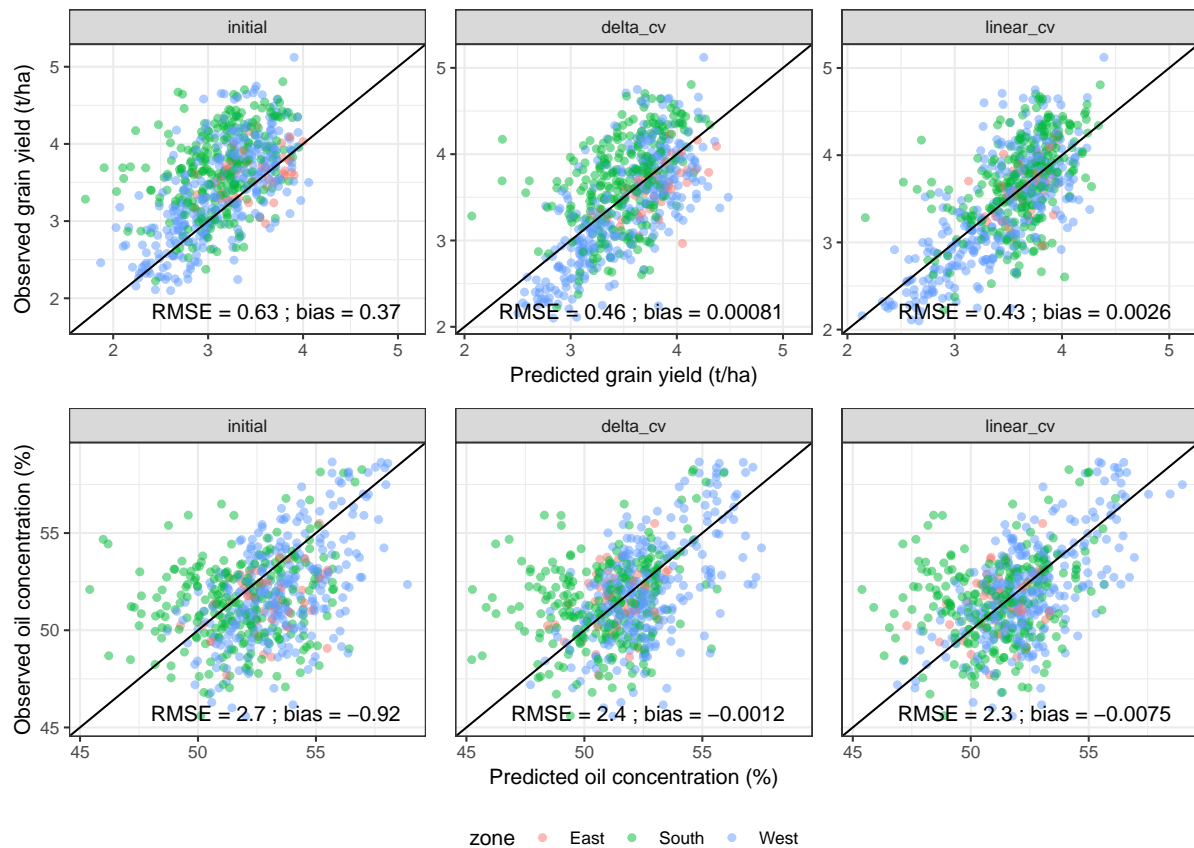

**Figure 3. Observed vs predicted values after empirical correction.** All genotypes are shown. Output variables are displayed in rows. The columns are the uncorrected model, the model corrected using just the average bias (delta method) and the model corrected using a linear function of the best input environmental variable (the linear method). The results are for cross validation.

We decomposed the mean-squared-error (MSE) into three error metrics (Kobayashi and Salam, 2000) to further analyse how each component was impacted by the calibration method (figure 4 and table 2).

About two thirds of MSE for yield for the initial model is due to the LCS term, which measures how well the simulated values track changes in the observations. About one third is from squared bias. A constant term in the linear correction will always eliminate bias exactly for the training data (*delta*). Most of that reduction still holds for prediction (as evidenced by the cross validation results). Adding an explanatory variable to the linear regression leads in addition to reduction in the LCS term, reducing it by about 34% for prediction (49 % in adjustment). The SDSD term, which measures the difference in the spread of the simulated values compared to the spread of the observations, is already very small for the initial model and remains small after correction.

The linear regression correction also eliminates the bias for oil concentration, both for the training data and for prediction. However, the squared bias is only 12% of MSE for the initial model, and so eliminating bias is relatively less effective for oil concentration than for yield. LCS is reduced by 17% by the linear regression correction, according to cross validation. Similar to yield, the SDSD term for oil concentration is very small initially and remains small.



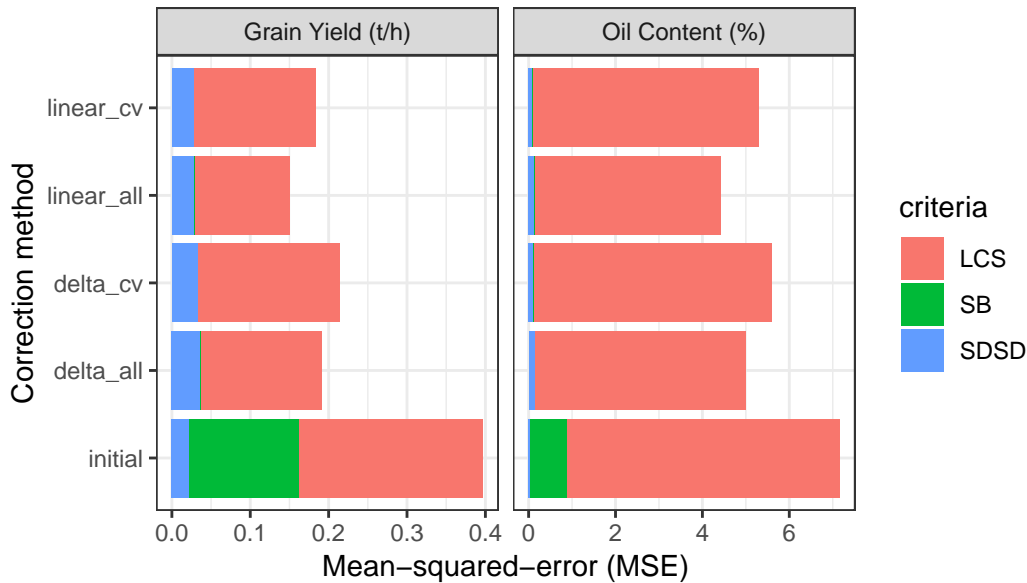

**Figure 4. Components of MSE.** Results (from bottom up) for the initial SUNFLO model, after correction for just bias based on all the data and as estimated by cross validation and after correction with the linear model based on all the data or estimated using cross validation.

| variable | n   | n_g      | criteria | initial | linear_all | linear_cv | relative_all | relative_cv |
|----------|-----|----------|----------|---------|------------|-----------|--------------|-------------|
| GY       | 614 | [16; 61] | MSE      | 0.397   | 0.150      | 0.184     | -0.623       | -0.536      |
| GY       | 614 | [16; 61] | SB       | 0.140   | 0.000      | 0.000     | -1.000       | -1.000      |
| GY       | 614 | [16; 61] | LCS      | 0.235   | 0.120      | 0.156     | -0.487       | -0.337      |
| GY       | 614 | [16; 61] | SDSD     | 0.022   | 0.029      | 0.028     | 0.339        | 0.303       |
| OC       | 570 | [16; 49] | MSE      | 7.160   | 4.412      | 5.285     | -0.384       | -0.262      |
| OC       | 570 | [16; 49] | SB       | 0.840   | 0.000      | 0.000     | -1.000       | -1.000      |
| OC       | 570 | [16; 49] | LCS      | 6.272   | 4.269      | 5.189     | -0.319       | -0.173      |
| OC       | 570 | [16; 49] | SDSD     | 0.047   | 0.143      | 0.096     | 2.025        | 1.029       |

**Table 3. Components and relative MSE reduction.** MSE and its components for grain yield (GY) or oil concentration (OC). The total number of observations (genotype  $\times$  year combinations) is indicated in the  $n$  column, while the range of observations per genotype is indicated in the column  $n_g$ . The column  $criteria$  is MSE or one of the three components that add up to MSE. Results are for the initial SUNFLO model, after correction with the linear model based on all the data or estimated using cross validation. Relative differences (computed as  $(corrected - initial)/initial$ ) between the corrected and initial models are shown in the  $relative\_all$  and  $relative\_cv$  columns.

To investigate the sensitivity of our method to the number of data points, we analyzed how the correction efficiency (computed as the relative MSE reduction for each genotype) was impacted by the number of observations (i.e. environments) available for each genotype. The number of observations per genotype had a weak effect on the correction efficiency, with p-values for the hypothesis that there is no effect of 0.724 and 0.254 respectively for grain yield and oil concentration (supplementary figure S2).

## Discussion

### Usefulness of an empirical correction

Our results show that the empirical correction we propose does provide a moderate improvement to model prediction, reducing MSE on the average over genotypes by 54% for prediction of yield and by 26% for prediction of oil content. This is done by making use of available variety testing data. To date,

these data have been used simply to evaluate the SUNFLO model. The approach here shows how these data can be used for improving predictions, without fundamentally changing the initial model. The linear regression correction approach here is analogous to post processing for climate models, where simple statistical corrections are applied to GCMs, rather than tampering with the model parameters, to improve agreement with local weather data (Mendoza et al., 2015).

The effectiveness of the linear regression correction depends on the nature of the errors for the initial model. To the extent that bias is a major contribution to MSE of the initial model, the linear correction should be very effective since the constant term removes bias exactly for the training data. The results here show that adding a correction based on an explanatory variable makes the correction more effective by reducing the contribution of the LCS term, which is related to the correlation of the observed and simulated values, though it doesn't completely eliminate the LCS contribution to MSE here. The results give no indication of whether the SDSD contribution to MSE, which measures the difference in variability among observed values compared to simulated values, will be effectively reduced, since this term plays only a negligible role here.

Because it is based on relationships between simulation residuals and environment-related variables, the linear regression correction gives useful information that could help improve the initial model. In the present study, in most cases a correction related to precipitation improved the prediction of grain yield. Simulation error was thus better explained by a simple climate variable (rainfall) than a model state variable (water deficit). When focusing on the relation between observed yield (rather than residuals) and water deficit, we previously showed that model state variables were better predictors than climate variables (Mangin et al., 2017). For example, as seen in figure 1 the model tends to under predict grain yield (positive residuals) for low rainfall situations while the predictions are closer to observations (slightly negative residuals) for high rainfall environments. In this case, these observations suggest that while water deficit is accounted for (not correlated to simulation residuals but correlated to grain yield), some processes associated to rainfall are lacking in the SUNFLO model. Overestimation in high rainfall conditions could be related to disease development (e.g sclerotinia, phomopsis stem canker), usually occurring in wetter environments. Another possible explanation is that there are problems in estimation of soil water holding capacity, which has a greater impact in low rainfall environments than when more frequent rain will compensate for a poor soil water capacity estimation (indicated by lower residuals in high rainfall environments).

## Comparison with calibration of genotype-dependent parameters

A more common way of adjusting a crop model to data than the linear regression correction here is to start from some default parameter values and then to modify them to better fit the data. There is a large literature on crop model calibration done by modifying the parameters, and a large diversity of approaches (Seidel et al., 2018). Compared to linear regression, crop model calibration poses practical difficulties. Numerical problems arise because models are generally non continuous as functions of the parameters (Liu et al., 2018). Software difficulties arise in coupling a crop model to algorithms that search the parameter space. On the other hand, fitting a linear regression equation to model residuals is very simple, and execution time is not a problem.

More fundamentally, it has been argued that the calibrated parameter values of crop models are, at least to some extent, correcting for errors throughout the model, and that for different target populations, different values would be needed (Wallach et al., 2011). Therefore, at least to some extent, adjusting the parameters of the initial model to field data is not giving additional information about true phenotypic response, but also simply providing an empirical correction. Furthermore, there is some evidence that the major gain from crop model calibration is reduction in bias (Guillaume et al., 2011). The approach here on the other hand keeps the original, meaningful values of the parameters and is guaranteed to eliminate bias completely (for the training data). In addition, our linear regression correction is giving information on the causes of model error, whereas it is very difficult to interpret the results of modifying the initial parameter values.

## Possible improvements

The approach here uses a single environmental variable in the linear correction, chosen from among a small set of variables that are known to have a strong effect on yield and oil concentration. It is important to use knowledge of the crop to limit the number of possible input variables. With very many possible variables there is a high risk of selection bias, where random error rather than true correlation determines the choice of explanatory variable (Winship and Mare, 1992). However, with more data more explanatory variables could be envisioned.

A very promising improvement of the approach here would be to use a random parameter model. In this study, each genotype was treated separately. This has the disadvantage of limiting the available data for each correction to only the data for that genotype. In fact, it seems reasonable to suppose that the corrections for different genotypes are somewhat similar. That could be taken into account by using a model that treats the parameters of the linear regression as random variables, with some distribution, and the parameters for individual genotypes as being drawn from that distribution. This is known as “borrowing strength” (Steenbergen and Jones, 2002) and the effectiveness will depend on the number of data points available for each individual and how similar the regressions are between individuals. A limiting case of borrowing strength would be the case where no data are available for some genotypes. In that case, one could apply an empirical correction that uses the mean values of the parameters obtained for the available genotypes.

## Conclusions

We propose a hybrid method for adapting a crop model to new genotypes. We suggest that the genotype-dependent parameters of the model could be obtained by phenotyping (or gene-based modeling). Then field data, especially variety trials, could be used to provide a simple empirical correction to the model. This approach combines the advantages of phenotyping, namely that the genotype-specific parameters have a clear meaning and are comparable between genotypes, and the advantages of fitting the model to field data, namely that the corrected model is adapted to a specific target population. It has the advantage of being very simple to apply, and furthermore gives useful information as to which environmental variables are not fully accounted for in the initial model. In this study, the empirical correction reduced MSE on the average by 54% for prediction of yield and by 26% for prediction of oil content.

## Acknowledgements

Research grants were provided by the French National Research Agency (ANR SUNRISE ANR-11-BTBR-0005). The authors are grateful to the staff from *Terres Inovia* (Frédéric Bardy, Philippe Christante, André Estragnat, Pascal Fauvin, Emmanuelle Mestries, Jean-Pierre Palleau, Célia Pontet, Frédéric Salvi) that helped to constitute the phenotypic and climatic database.

## Supplementary material

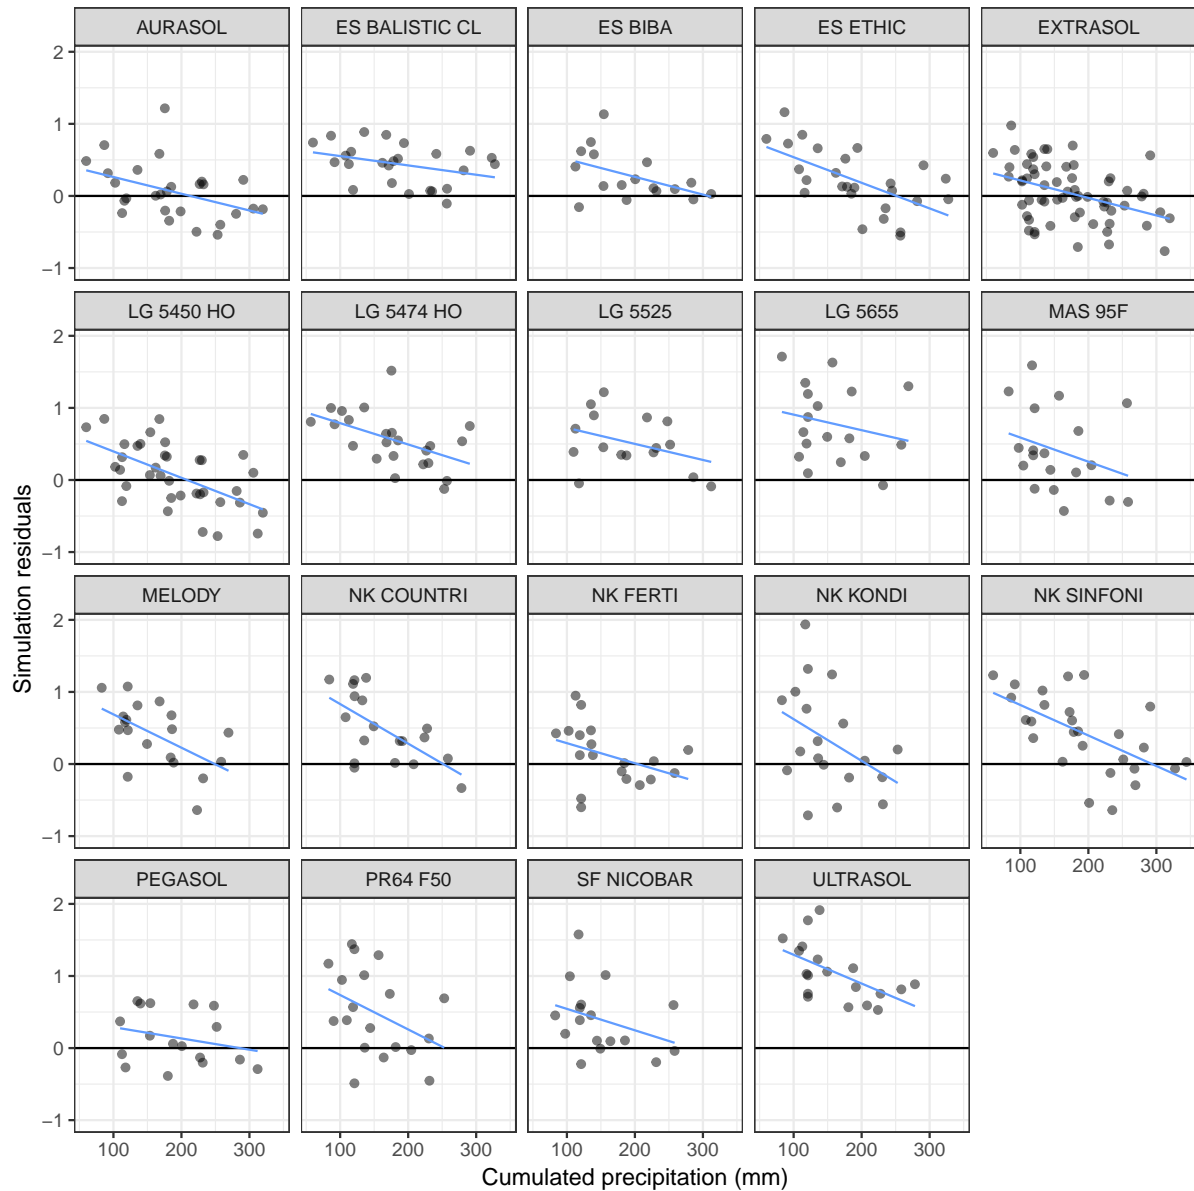

**Figure S1. Linear regression of simulation model residuals versus selected environment-related variables.** The panels display simulation model residuals as a linear function of accumulated precipitation, for each genotype with more than 10 observations in the trial network (blue lines). This figure shows the individual genotypes that are shown together in the upper left panel in figure 2.

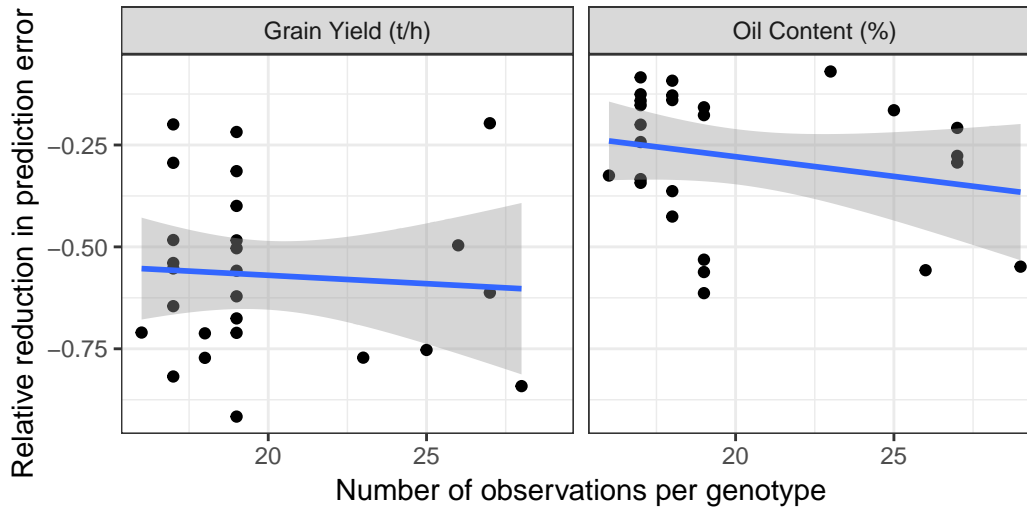

**Figure S2. Efficiency of the calibration process as a function of the number of data points per genotype** The efficiency of the calibration process is calculated as the relative reduction in prediction error for each genotype  $((MSE_{calibrated} - MSE_{initial})/MSE_{initial})$ . Regression line is indicated in blue and uncertainty interval in grey.

## References

- Bergez, J., Chabrier, P., Gary, C., Jeuffroy, M., Makowski, D., Quesnel, G., Ramat, E., Raynal, H., Rouse, N., Wallach, D., Debaeke, P., Durand, P., Duru, M., Dury, J., Faverdin, P., Gascuel-Oudou, C., Garcia, F., 2013. An open platform to build, evaluate and simulate integrated models of farming and agro-ecosystems. *Environmental Modelling & Software* 39, 39–49. <https://doi.org/10.1016/j.envsoft.2012.03.011>
- Brisson, N., Gary, C., Justes, E., Roche, R., Mary, B., Ripoche, D., Zimmer, D., Sierra, J., Bertuzzi, P., Burger, P., Bussière, F., Cabidoche, Y.M., Cellier, P., Debaeke, P., Gaudillère, J.P., Hénault, C., Maraux, F., Seguin, B., Sinoquet, H., 2003. An overview of the crop model STICS. *European Journal of Agronomy* 18, 309–332. [https://doi.org/10.1016/s1161-0301\(02\)00110-7](https://doi.org/10.1016/s1161-0301(02)00110-7)
- Casadebaig, P., Debaeke, P., Lecoer, J., 2008. Thresholds for leaf expansion and transpiration response to soil water deficit in a range of sunflower genotypes. *European Journal of Agronomy* 28, 646–654. <https://doi.org/10.1016/j.eja.2008.02.001>
- Casadebaig, P., Guilioni, L., Lecoer, J., Christophe, A., Champolivier, L., Debaeke, P., 2011. SUNFLO, a model to simulate genotype-specific performance of the sunflower crop in contrasting environments. *Agricultural and Forest Meteorology* 151, 163–178. <https://doi.org/10.1016/j.agrformet.2010.09.012>
- Casadebaig, P., Mestries, E., Debaeke, P., 2016. A model-based approach to assist variety assessment in sunflower crop. *European Journal of Agronomy* 81, 92–105. <https://doi.org/10.1016/j.eja.2016.09.001>
- Casadebaig, P., Zheng, B., Chapman, S., Huth, N., Faivre, R., 2016. Assessment of the potential impacts of wheat plant traits across environments by combining crop modeling and global sensitivity analysis. *PLoS ONE* 11, e0146385. <https://doi.org/10.1371/journal.pone.0146385>
- Cooper, M., Technow, F., Messina, C., Ghossein, C., Totir, L.R., 2016. Use of crop growth models with whole-genome prediction: Application to a maize multi-environment trial. *Crop Science*. <https://doi.org/10.2135/cropsci2015.08.0512>
- Debaeke, P., Casadebaig, P., Haquin, B., Mestries, E., Palleau, J.-P., Salvi, F., 2010. Simulation de la réponse variétale du tournesol à l'environnement à l'aide du modèle sunflo. *Oilseeds and fats, Crops and Lipids* 17, 143–51. <https://doi.org/10.1684/ocl.2010.0308>
- Furbank, R.T., Tester, M., 2011. Phenomics technologies to relieve the phenotyping bottleneck. *Trends in Plant Science* 16, 635–644. <https://doi.org/10.1016/j.tplants.2011.09.005>
- Gosseau, F., Blanchet, N., Varès, D., Burger, P., Campergue, D., Colombet, C., Gody, L., Liévin, J.-F., Mangin, B., Tison, G., Vincourt, P., Casadebaig, P., Langlade, N., 2019. Heliaphen, an outdoor high-throughput phenotyping platform for genetic studies and crop modeling. *Frontiers in Plant Science* 9. <https://doi.org/10.3389/fpls.2018.01908>
- Guillaume, S., Bergez, J.-E., Wallach, D., Justes, E., 2011. Methodological comparison of calibration procedures for durum wheat parameters in the STICS model. *European Journal of Agronomy* 35, 115–126. <https://doi.org/10.1016/j.eja.2011.05.003>
- Hammer, G., Messina, C., Oosterom, E. van, Chapman, S., Singh, V., Borrell, A., Jordan, D., Cooper, M., 2016. Molecular breeding for complex adaptive traits: How integrating crop ecophysiology and modelling can enhance efficiency, in: *Crop Systems Biology*. Springer, pp. 147–162. [https://doi.org/10.1007/978-3-319-20562-5\\_7](https://doi.org/10.1007/978-3-319-20562-5_7)
- Holzworth, D.P., Huth, N.I., deVoil, P.G., Zurcher, E.J., Herrmann, N.I., McLean, G., Chenu, K., Oosterom, E.J. van, Snow, V., Murphy, C., Moore, A.D., Brown, H., Whish, J.P., Verrall, S., Fainges, J., Bell, L.W., Peake, A.S., Poulton, P.L., Hochman, Z., Thorburn, P.J., Gaydon, D.S., Dalgliesh, N.P., Rodriguez, D., Cox, H., Chapman, S., Doherty, A., Teixeira, E., Sharp, J., Cichota, R., Vogeler, I., Li, F.Y., Wang, E., Hammer, G.L., Robertson, M.J., Dimes, J.P., Whitbread, A.M., Hunt, J., Rees, H. van, McClelland, T., Carberry, P.S., Hargreaves, J.N., MacLeod, N., McDonald, C., Harsdorf, J., Wedgwood, S., Keating, B.A., 2014. APSIM - Evolution towards a new generation of agricultural systems simulation. *Environmental Modelling & Software* 62, 327–350. <https://doi.org/http://dx.doi.org/10.1016/j.envsoft.2014.07.009>
- Jones, J.W., Hoogenboom, G., Porter, C., Boote, K., Batchelor, W., Hunt, L., Wilkens, P., Singh, U., Gijsman, A., Ritchie, J., 2003. The DSSAT cropping system model. *European journal of agronomy* 18,



235–265. [https://doi.org/10.1016/s1161-0301\(02\)00107-7](https://doi.org/10.1016/s1161-0301(02)00107-7)

Jørgensen, S.E., Fath, B.D., 2011. Fundamentals of ecological modelling: Applications in environmental management and research. Elsevier.

Kobayashi, K., Salam, M., 2000. Comparing simulated and measured values using mean squared deviation and its components. *Agronomy Journal* 92, 345–352.

Lecoeur, J., Poiré-Lassus, R., Christophe, A., Pallas, B., Casadebaig, P., Debaeke, P., Vear, F., Guilioni, L., 2011. Quantifying physiological determinants of genetic variation for yield potential in sunflower. SUNFLO: a model-based analysis. *Functional Plant Biology* 38, 246–259. <https://doi.org/10.1071/fp09189>

Li, Z.T., Yang, J., Drury, C., Hoogenboom, G., 2015. Evaluation of the DSSAT-CSM for simulating yield and soil organic c and n of a long-term maize and wheat rotation experiment in the loess plateau of northwestern china. *Agricultural Systems* 135, 90–104. <https://doi.org/10.1016/j.agsy.2014.12.006>

Liu, L., Wallach, D., Li, J., Liu, B., Zhang, L., Tang, L., Zhang, Y., Qiu, X., Cao, W., Zhu, Y., 2018. Uncertainty in wheat phenology simulation induced by cultivar parameterization under climate warming. *European Journal of Agronomy* 94, 46–53. <https://doi.org/10.1016/j.eja.2017.12.001>

Mangin, B., Casadebaig, P., Cadic, E., Blanchet, N., Boniface, M.-C., Carrère, S., Gouzy, J., Legrand, L., Mayjonade, B., Pouilly, N., André, T., Coque, M., Piquemal, J., Laporte, M., Vincourt, P., Muñoz, S., Langlade, N.B., 2017. Genetic control of plasticity of oil yield for combined abiotic stresses using a joint approach of crop modeling and genome-wide association. *Plant, Cell and Environment*. <https://doi.org/10.1111/pce.12961>

Mendoza, P.A., Rajagopalan, B., Clark, M.P., Ikeda, K., Rasmussen, R.M., 2015. Statistical postprocessing of high-resolution regional climate model output. *Monthly Weather Review* 143, 1533–1553. <https://doi.org/10.1175/mwr-d-14-00159.1>

Mestries, E., Jouffret, P., 2002. Comment le CETIOM évalue les variétés. *Oléoscope* 66, 4–8.

Picheny, V., Casadebaig, P., Trépos, R., Faivre, R., Da Silva, D., Vincourt, P., Costes, E., 2017. Using numerical plant models and phenotypic correlation space to design achievable ideotypes. *Plant, Cell & Environment*. <https://doi.org/10.1111/pce.13001>

Quesnel, G., Duboz, R., Ramat, É., 2009. The Virtual Laboratory Environment – An operational framework for multi-modelling, simulation and analysis of complex dynamical systems. *Simulation Modelling Practice and Theory* 17, 641–653. <https://doi.org/10.1016/j.simpat.2008.11.003>

R Core Team, 2018. R: A language and environment for statistical computing. R Foundation for Statistical Computing, Vienna, Austria.

Ruget, F., Brisson, N., Delécolle, R., Faivre, R., 2002. Sensitivity analysis of a crop simulation model, STICS, in order to choose the main parameters to be estimated. *Agronomie* 22, 133–158. <https://doi.org/10.1051/agro:2002009>

Seidel, S.J., Palosuo, T., Thorburn, P., Wallach, D., 2018. Towards improved calibration of crop models—where are we now and where should we go? *European Journal of Agronomy* 94, 25–35. <https://doi.org/10.1016/j.eja.2018.01.006>

Steenbergen, M.R., Jones, B.S., 2002. Modeling multilevel data structures. *American Journal of Political Science* 46, 218. <https://doi.org/10.2307/3088424>

Tardieu, F., Cabrera-Bosquet, L., Pridmore, T., Bennett, M., 2017. Plant phenomics, from sensors to knowledge. *Current Biology* 27, R770–R783. <https://doi.org/10.1016/j.cub.2017.05.055>

Van Ittersum, M., Rabbinge, R., 1997. Concepts in production ecology for analysis and quantification of agricultural input-output combinations. *Field Crops Research* 52, 197–208.

Wallach, D., Buis, S., Lecharpentier, P., Bourges, J., Clastre, P., Launay, M., Bergez, J.-E., Guerif, M., Soudais, J., Justes, E., 2011. A package of parameter estimation methods and implementation for the STICS crop-soil model. *Environmental Modelling & Software* 26, 386–394.

Wallach, D., Hwang, C., Correll, M.J., Jones, J.W., Boote, K., Hoogenboom, G., Gezan, S., Bhakta, M., Vallejos, C.E., 2018. A dynamic model with QTL covariables for predicting flowering time of

common bean (*phaseolus vulgaris*) genotypes. *European Journal of Agronomy* 101, 200–209. <https://doi.org/10.1016/j.eja.2018.10.003>

Wickham, H., 2016. *Ggplot2: Elegant graphics for data analysis*. Springer-Verlag New York.

Wickham, H., François, R., Henry, L., Müller, K., 2018. *Dplyr: A grammar of data manipulation*.

Winship, C., Mare, R.D., 1992. Models for sample selection bias. *Annual review of sociology* 18, 327–350.

Xie, Y., 2015. *Dynamic documents with R and knitr*, 2nd ed. Chapman; Hall/CRC, Boca Raton, Florida.
